# Supplementary material for: Transgenic Overexpression of Tcfap2c/AP-2gamma Results in Liver Failure and Intestinal Dysplasia
Source: PubMed Central journal article supplement (PMC3135619; doi:10.1371/journal.pone.0022034), 2011-07-13
Supplement: pone.0022034.s001.pdf [file pone.0022034.s001.pdf]

Table S1

| organ                | remarks                      | control | double transgenic |
|----------------------|------------------------------|---------|-------------------|
| thymus               | all cells                    | -       | +                 |
| liver                | hepatocytes                  | -       | +++               |
|                      | endothelial cells            | -       | -                 |
|                      | bile ducts intrahepatic      | -       | +                 |
|                      | bile ducts extrahepatic      | -       | +++               |
| kidney               | tubular cortex               | -       | +                 |
|                      | collecting ducts (medulla)   | -       | +                 |
|                      | interstitial cells (medulla) | -       | -                 |
| heart                | myocytes                     | -       | +                 |
|                      | interstitial fibroblasts     | -       | +                 |
|                      | endothelial cells            | -       | +                 |
|                      | pericardial cells            | -       | +                 |
| intestine<br>(small) | crypt cells                  | -       | +++               |
|                      | villi                        | -       | +++               |
|                      | mesenchymal cells            | -       | -                 |
| intestine (large)    |                              | n.d.    | +++               |
| stomach              |                              | -       | +++               |
| pancreas             | islet cells                  | -       | +++               |
|                      | acinar cells                 | -       | +                 |
| lung                 | bronchial epithelial cells   | -       | ++                |
|                      | alveolar cells               | -       | +                 |
|                      | interstitial fibroblasts     | -       | +                 |
|                      | endothelial cells            | -       | -                 |
| skin                 | epithelial (epidermis)       | -       | +++               |
|                      | fibroblast (dermis)          | -       | ++                |
|                      | adipocytes                   | -       | +                 |
| muscle               |                              | -       | -                 |
| bone marrow          |                              | -       | ++                |
| testis               | peritubular cells            | -       | +                 |
|                      | all other                    | -       | -                 |
| breast               |                              | n.d.    | ++                |
| uterus               | endometrium                  | n.d.    | +++               |
|                      | myometrium                   | n.d.    | +                 |
| ovary                |                              | n.d.    | +                 |

**Quantification of Tcfap2c induction** in various organs (left columns) based on immunohistochemical Tcfap2c detection. For this tissue specific analysis double transgenic male and female mice were induced for three days with doxycycline. Expression level was scored using the following schematic:

- no expression

+ <10% of the cells score Tcfap2c positive

++ 10–50% of the cells score Tcfap2c positive

+++ 50–100% of the cells score Tcfap2c positive

n.d. = not determined
