# Supplementary material for: Transgenic Overexpression of Tcfap2c/AP-2gamma Results in Liver Failure and Intestinal Dysplasia
Source: PubMed Central journal article supplement (PMC3135619; doi:10.1371/journal.pone.0022034), 2011-07-13
Supplement: pone.0022034.s002.pdf [file pone.0022034.s002.pdf]

Table S2

Significant functional categories based on common genes regulated by Tcfap2c in liver and hepatocyte cultures

| Category                                  | B-H p-value       | Common regulated genes (red = upregulated, black = downregulated)                                                                                                                                                                                                                                                                                                                                                                                                                                                                                                                                                                                                                                                                                                                                                                                                                                                                                                                                                                                 |
|-------------------------------------------|-------------------|---------------------------------------------------------------------------------------------------------------------------------------------------------------------------------------------------------------------------------------------------------------------------------------------------------------------------------------------------------------------------------------------------------------------------------------------------------------------------------------------------------------------------------------------------------------------------------------------------------------------------------------------------------------------------------------------------------------------------------------------------------------------------------------------------------------------------------------------------------------------------------------------------------------------------------------------------------------------------------------------------------------------------------------------------|
| Lipid Metabolism                          | 3.9E-12-1.18E-01  | PPARA, LIPC, SLC27A2, APOC4, VTN, <b>PLA1A</b> , <b>PLA2G7</b> , ATP8B1, MTPP, POR, FDFT1, <b>SOAT2</b> , PLCE1, ALDH1A1, LPIN1, FGFR4, <b>SULT1E1</b> , BAAT, AMACR, GLYAT, ALDH8A1, SLC01A2, ACOT12, PLSCR2, <b>ABCB1B</b> , ACADS, <b>PLA2G6</b> , ALDH1A7, GCK, FADS2, <b>SIK1</b> , ACOT4, MLYCD, CYP2B6, CPS1, AGTR1, FADS1, ANGPTL3, <b>ADM</b> , IGFBP4, SLC10A1, APOF, ADH1C, PROX1, ACOT7, <b>MOGAT1</b> , AVPR1A, <b>SGMS1</b> , AADAC, <b>MTOR</b> , IGF1, PPAP2B, <b>AGPAT2</b> , CEBPA, UGT2B17, ADORA1, <b>ACE</b> , <b>UCP2</b> , CYP27A1, <b>COTL1</b> , <b>PPARD</b> , HSD17B7, <b>G6PD</b> , <b>COL4A3BP</b> , UGT2B10, FDPS, GULO, GHR, CYP3A4, ABCB4, SULT1A1, CAT, FKBP4, UGT2B15, <b>G6PC</b> , <b>RDH5</b> , AOX1, <b>DGAT1</b> , <b>LGALS1</b> , ADH4                                                                                                                                                                                                                                                                    |
| Small Molecule Biochemistry               | 3.9E-12-1.18E-01  | <b>TGFBR1</b> , LIPC, DPYD, SLC27A2, VTN, APOC4, <b>PLA1A</b> , ATP8B1, POR, LPIN1, <b>HAL</b> , UOX, <b>SULT1E1</b> , BAAT, AMACR, PAH, ACOT12, PLSCR2, ONECUT1, <b>PLA2G6</b> , FADS2, <b>SIK1</b> , CYP2B6, CPS1, EPHX1, <b>ADM</b> , ALDH4A1, SLC10A1, PROX1, AVPR1A, <b>SGMS1</b> , <b>MTOR</b> , IGF1, PPAP2B, CEBPA, ADORA1, <b>UCP2</b> , <b>COL4A3BP</b> , FAH, <b>SLC43A2</b> , GULO, ABCB4, SULT1A1, FKBP4, <b>DGAT1</b> , AOX1, PPARA, HEBP1, <b>PLA2G7</b> , <b>CDA</b> , MTPP, <b>FGFR3</b> , FDFT1, <b>SOAT2</b> , ALDH1A1, PLCE1, FGFR4, GLYAT, ALDH8A1, SLC01A2, <b>SLC1A1</b> , <b>ABCB1B</b> , ACADS, ALDH1A7, GCK, SLC7A2, ACOT4, PDK2, MLYCD, AGTR1, ANGPTL3, FADS1, ARG1, IGFBP4, APOF, ADH1C, ACOT7, <b>MOGAT1</b> , AADAC, <b>AGPAT2</b> , UGT2B17, SLC25A15, PDK1, <b>ACE</b> , <b>SRC</b> , DPP4, <b>PXN</b> , SLC25A13, HPD, CYP27A1, <b>PPARD</b> , <b>COTL1</b> , AQP11, HSD17B7, <b>G6PD</b> , UGT2B10, SCLY, FDPS, GHR, CYP3A4, CAT, UGT2B15, <b>G6PC</b> , <b>RDH5</b> , GLDC, CYP2A6, A1CF, <b>LGALS1</b> , ADH4 |
| Vitamin and Mineral Metabolism            | 3.61E-10-1.18E-01 | <b>ADM</b> , LIPC, APOF, ADH1C, PROX1, ATP8B1, MTPP, POR, FDFT1, <b>SOAT2</b> , ALDH1A1, UGT2B17, <b>SULT1E1</b> , BAAT, AMACR, CYP27A1, <b>PPARD</b> , <b>G6PD</b> , HSD17B7, ALDH8A1, FDPS, CYP3A4, ALDH1A7, CAT, UGT2B15, <b>G6PC</b> , <b>DGAT1</b> , AOX1, <b>RDH5</b> , CYP2B6, ANGPTL3, ADH4                                                                                                                                                                                                                                                                                                                                                                                                                                                                                                                                                                                                                                                                                                                                               |
| Hepatic System Disease                    | 1.71E-08-1.18E-01 | PPARA, LIPC, DPYD, VTN, <b>SLC17A1</b> , ATP8B1, MTPP, <b>FGFR3</b> , POR, FDFT1, <b>SOAT2</b> , ALDOB, LPIN2, BAAT, PAH, TDO2, SLC01A2, IFNAR2, VKORC1, <b>EPHA2</b> , AGTR1, EPHX1, SLC10A1, ADH1C, IQGAP1, AVPR1A, CASP6, AADAC, <b>MTOR</b> , <b>JUN</b> , IGF1, <b>TUBA8</b> , <b>STEAP2</b> , <b>ALPL</b> , <b>ACE</b> , <b>SRC</b> , GSTM1, SLC25A13, HPD, CYP27A1, UGT2B10, GHR, ABCB4, SULT1A1, CAT, CRP, UGT2B15, <b>DGAT1</b> , ADH4                                                                                                                                                                                                                                                                                                                                                                                                                                                                                                                                                                                                   |
| Molecular Transport                       | 1.04E-05-1.18E-01 | PPARA, LIPC, SLC27A2, APOC4, HEBP1, <b>PLA1A</b> , MTPP, ATP8B1, POR, LIFR, FDFT1, <b>SOAT2</b> , ALDH1A1, LPIN1, FGFR4, <b>SULT1E1</b> , ALDH8A1, SLC01A2, <b>SLC1A1</b> , PLSCR2, <b>ABCB1B</b> , <b>PLA2G6</b> , GCK, SLC7A2, FADS2, <b>SIK1</b> , CYP2B6, ANGPTL3, KLF15, <b>ADM</b> , SLC10A1, APOF, ADH1C, AVPR1A, <b>SGMS1</b> , AADAC, <b>MTOR</b> , IGF1, SLC2A2, <b>AGPAT2</b> , CEBPA, SLC25A15, ADORA1, <b>ACE</b> , SLC25A13, <b>UCP2</b> , CYP27A1, <b>PPARD</b> , AQP11, <b>G6PD</b> , <b>SLC43A2</b> , GHR, GULO, CYP3A4, ABCB4, CAT, FKBP4, <b>G6PC</b> , <b>RDH5</b> , <b>DGAT1</b> , <b>LGALS1</b> , ADH4                                                                                                                                                                                                                                                                                                                                                                                                                      |
| Drug Metabolism                           | 4.73E-05-1.18E-01 | <b>ADM</b> , IGFBP4, GSTM5, VTN, ADH1C, POR, GSTM2, ALDH1A1, IGF1, GSTM3 (includes EG:14864), GSTM4, UGT2B17, <b>SULT1E1</b> , GSTA3, GSTM1, ALDH8A1, HSD17B7, <b>ABCB1B</b> , CYP3A4, ABCB4, ALDH1A7, SULT1A1, <b>RDH5</b> , CYP2B6, CYP2A6, ADH4                                                                                                                                                                                                                                                                                                                                                                                                                                                                                                                                                                                                                                                                                                                                                                                                |
| Endocrine System Development and Function | 4E-04-1.18E-01    | <b>ADM</b> , IGFBP4, <b>TGFBR1</b> , HSD17B7, NRG4, ONECUT1, POR, IGF1, CYP3A4, ALDH1A7, SULT1A1, UGT2B17, <b>SULT1E1</b> , CYP2B6                                                                                                                                                                                                                                                                                                                                                                                                                                                                                                                                                                                                                                                                                                                                                                                                                                                                                                                |
| Metabolic Disease                         | 7.85E-04-1.18E-01 | <b>TGFBR1</b> , LIPC, DDC, TFR2, <b>SLC17A1</b> , <b>MLLT4</b> , ATP8B1, POR, <b>HAL</b> , LPIN1, PAH, AMACR, <b>RNMT</b> , TAT, PLSCR2, ONECUT1, <b>PLA2G6</b> , VKORC1, FADS2, <b>RPS6KA1</b> , CPS1, ALDH4A1, SLC10A1, <b>DAPK2</b> (includes EG:23604), PROX1, AVPR1A, XYLB, <b>ARHGEF19</b> , <b>MTOR</b> , IYD, IGF1, <b>TUBA8</b> , CEBPA, ADORA1, CLYBL, <b>UCP2</b> , FAH, PGCP, FAM114A1, FGGY, FKBP4, <b>DGAT1</b> , CTH, <b>MYO1E</b> , PPARA, <b>ARHGAP26</b> , HMGCS2, <b>CDA</b> , MTPP, <b>FLVCR1</b> , FDFT1, <b>SOAT2</b> , ALDH1A1, <b>RIPK4</b> , <b>SLC1A1</b> , ACADS, GYS2, <b>TMCC3</b> , GCK, ITIH5, AUH, SAMM50, MLYCD, AGTR1, ARG1, <b>TBC1D22A</b> , PKLR, RAPGEF4, ACOT7, <b>CLIC4</b> , IQGAP1, <b>MCM4</b> , <b>STEAP2</b> , <b>AGPAT2</b> , SLC2A2, SLC25A15, <b>ALPL</b> , <b>ACE</b> , MMP19, TPMT, NDUFAF4, DPP4, SLC25A13, HPD, CYP27A1, <b>PPARD</b> , <b>TCF7L1</b> , SCLY, FDPS, <b>PMP22</b> , GHR, CRP, <b>FAM135A</b> , DBT, <b>G6PC</b> , CYB5A, GLDC, CYP2A6                                          |
| Amino Acid Metabolism                     | 3.06E-03-1.18E-01 | BAAT, <b>SRC</b> , DPP4, PAH, ALDH4A1, <b>PXN</b> , SLC25A13, <b>TGFBR1</b> , HPD, <b>SLC1A1</b> , FAH, SCLY, <b>FGFR3</b> , <b>SLC43A2</b> , <b>MTOR</b> , GHR, <b>HAL</b> , IGF1, SLC7A2, CEBPA, SLC25A15, GLDC, ARG1                                                                                                                                                                                                                                                                                                                                                                                                                                                                                                                                                                                                                                                                                                                                                                                                                           |
