# Supplementary material for: Transgenic Overexpression of Tcfap2c/AP-2gamma Results in Liver Failure and Intestinal Dysplasia
Source: PubMed Central journal article supplement (PMC3135619; doi:10.1371/journal.pone.0022034), 2011-07-13
Supplement: pone.0022034.s003.pdf [file pone.0022034.s003.pdf]

Table S3

## Regulated canonical pathways based on liver and hepatocyte common gene list

| Canonical Pathways                           | -log(B-H p-value) | Common regulated genes                                                                                                                                                                                                                             |
|----------------------------------------------|-------------------|----------------------------------------------------------------------------------------------------------------------------------------------------------------------------------------------------------------------------------------------------|
| Metabolism of Xenobiotics by Cytochrome P450 | 11,072            | GSTA3, GSTM1, GSTM5, CYP2C70, CYP2A12, ADH1C, UGT2B10, CYP2J5, CYP3A43, GSTM2, CYP3A4, GSTM6, GSTM3 (includes EG:14864), UGT2B15, GSTM4, UGT2B17, CYP2B6, ADHFE1, CYP2A6, EPHX1, ADH4                                                              |
| LPS/IL-1 Mediated Inhibition of RXR Function | 9,662             | PPARA, ALDH4A1, SLC10A1, LIPC, GSTM5, SLC27A2, APOC4, FMO5, HMGCS2, JUN, GSTM2, ALDH1A1, GSTM3 (includes EG:14864), GSTM4, SULT1E1, GSTA3, GSTM1, CYP2A12, ALDH8A1, SLCO1A2, SULT1D1, CYP3A4, SULT1A1, CAT, CYP2B6, CYP2A6                         |
| Xenobiotic Metabolism Signaling              | 6,982             | ALDH4A1, CES2 (includes EG:234671), GSTM5, NQO2, FMO5, GSTM2, ALDH1A1, GSTM3 (includes EG:14864), KEAP1, GSTM4, UGT2B17, SULT1E1, GSTA3, GSTM1, CES6, 2210023G05RIK, ALDH8A1, UGT2B10, SULT1D1, ESD, CYP3A4, SULT1A1, CAT, UGT2B15, MAP2K3, CYP2B6 |
| Tryptophan Metabolism                        | 6,26              | ALDH4A1, AADAT, TDO2, DDC, CYP2C70, CYP2A12, CYP2J5, ACMSD, CYP3A43, ALDH1A1, CYP3A4, ALDH1A7, CAT, AUH, CYP2B6, AOX1, CYP2A6, KYNU                                                                                                                |
| Glycerolipid Metabolism                      | 5,789             | ALDH4A1, DGKD, LIPC, ADH1C, UGT2B10, MOGAT1, LPIN1, ALDH1A1, ALDH1A7, PPAP2B, AGPAT2, DGAT1, LPIN2, ADHFE1, ADH4                                                                                                                                   |
| Fatty Acid Metabolism                        | 5,604             | ALDH4A1, SLC27A2, CYP2C70, CYP2A12, ADH1C, CYP2J5, ACADS, CYP3A43, ALDH1A1, CYP3A4, ALDH1A7, AUH, CYP2B6, ADHFE1, CYP2A6, ADH4                                                                                                                     |
| Bile Acid Biosynthesis                       | 4,821             | BAAT, ALDH4A1, SOAT2, ALDH1A1, CYP3A4, CYP27A1, ALDH1A7, ADH1C, ADHFE1, ADH4                                                                                                                                                                       |
| Retinol Metabolism                           | 4,819             | ALDH1A1, ALDH1A7, ALDH8A1, UGT2B15, UGT2B17, UGT2B10, RDH5, ADH4                                                                                                                                                                                   |
| Butanoate Metabolism                         | 4,095             | ALDH4A1, AADAC, ALDH1A1, ALDH1A7, AUH, DBT, SDHC, HMGCL, HMGCS2, ACADS                                                                                                                                                                             |
| PXR/RXR Activation                           | 4,068             | PPARA, GSTM1, GSTM2, ALDH1A1, CYP3A4, ALDH1A7, G6PC, CYP2B6, HMGCS2, CYP2A6                                                                                                                                                                        |
| Linoleic Acid Metabolism                     | 3,642             | PLA2G6, CYP3A43, CYP3A4, CYP2C70, CYP2A12, FADS2, CYP2B6, PLA2G7, CYP2A6, CYP2J5, FADS1                                                                                                                                                            |
| Glutathione Metabolism                       | 3,462             | GSTA3, GSTM1, GSTM2, GSTM6, GSTM5, GSTM3 (includes EG:14864), G6PD, GSTM4, ANPEP                                                                                                                                                                   |
| Glycolysis/Gluconeogenesis                   | 3,451             | ALDH4A1, ALDH1A1, PKLR, ALDOB, ALDH1A7, GCK, ADH1C, LRRC16A, G6PC, ADHFE1, ADH4                                                                                                                                                                    |
| FXR/RXR Activation                           | 3,433             | PPARA, BAAT, LIPC, SLC10A1, ABCB4, PKLR, CYP27A1, FGFR4, G6PC, FOXA3, MTPP                                                                                                                                                                         |
| Tyrosine Metabolism                          | 3,364             | IYD, HPD, DDC, ADH1C, DBT, TAT, AOX1, ADHFE1, FAH, ADH4                                                                                                                                                                                            |
| Aryl Hydrocarbon Receptor Signaling          | 3,223             | GSTA3, ALDH4A1, GSTM1, SRC, GSTM5, NQO2, ALDH8A1, GSTM2, ALDH1A1, JUN, GSTM3 (includes EG:14864), GSTM4, HSPB1                                                                                                                                     |
| $\beta$ -alanine Metabolism                  | 3,136             | ALDH4A1, ALDH1A1, DPYD, ALDH1A7, AUH, MLYCD, UPB1, ACADS                                                                                                                                                                                           |
| Valine, Leucine and Isoleucine Degradation   | 3,085             | ALDH4A1, ALDH1A1, ALDH1A7, AUH, DBT, AOX1, HMGCL, HMGCS2, ACADS                                                                                                                                                                                    |
| Pentose and Glucuronate Interconversions     | 2,951             | XYLB, UGDH, UGT2B15, UGT2B17, UGT2B10, ADH4                                                                                                                                                                                                        |
