# Supplementary material for: Transgenic Overexpression of Tcfap2c/AP-2gamma Results in Liver Failure and Intestinal Dysplasia
Source: PubMed Central journal article supplement (PMC3135619; doi:10.1371/journal.pone.0022034), 2011-07-13
Supplement: pone.0022034.s004.pdf [file pone.0022034.s004.pdf]

Table S4

## Transcriptional gene network regulated by Tcfap2c induction

| Top Functions                                                                                                       | Molecules in Network (Black = Common regulated genes)                                                                                                                                                                                                                      | Score | Focus Molecules |
|---------------------------------------------------------------------------------------------------------------------|----------------------------------------------------------------------------------------------------------------------------------------------------------------------------------------------------------------------------------------------------------------------------|-------|-----------------|
| Lipid Metabolism, Small Molecule Biochemistry, Carbohydrate Metabolism                                              | ACADS, ACP5, ALDH1A7, ALPL, CREBL2, CRIP2, CYP2B6, FADS1, FADS2, FDPS, FSH, G6PD, GCK, GHR, hCG, Histone h3, IGFBP4, IRAK2, ITGB5, Lh, LRRC32, MAP2K3, MMP19, ORM1, PAH, PKLR, PPAP2B, PPARA, RAB4A, SLC2A2, SQLE, TGFB1, TGFB3, TPM1, TPM2                                | 41    | 30              |
| Cellular Movement, Endocrine System Development and Function, Lipid Metabolism                                      | Akt, Ap1, CEBPA, Creb, DGAT1, DUSP1, ERK, ERK1/2, Estrogen Receptor, FDFT1, FKBP4, Focal adhesion kinase, GSTM4, H19, Hsp90, HSPB1, IGF1, Jnk, JUN, JUNB, LASP1, LDL, LIPC, NUAK1, -, PLA2G7, PLCE1, PXN, RPS6KA1, SFN, SRC, TFAP2C, VCL, VTN                              | 27    | 23              |
| Lipid Metabolism, Small Molecule Biochemistry, Vitamin and Mineral Metabolism                                       | AADAC, ADH4, ANGPTL3, AP3M1, APCS, CYP2J5, HAL, HAO1, HGFAC, HNF1A, HNF1B, PGCP, PLA1A, SOAT2, SULT1D1, TFR2, TFR3, UGT2B15                                                                                                                                                | 20    | 15              |
| Lipid Metabolism, Small Molecule Biochemistry, Vitamin and Mineral Metabolism                                       | ACMSD, ADH1C, ALDH1A1, BAAT, CES6, CES2 (includes EG:234671), CYP2C9, CYP7A1, DBI, DDC, FOXA1, FOXA2, FOXA3, HMGS2, HNF1A, HNF1B, HNF4A, LRP5, NR0B2, NR1H4, NR1I2, NR1I3, NR3C1, NR5A2, ONECUT1, PCK1, PKP2, POR, PTMS, STOM, SULT1A1, SULT1E1, TAT, UGT2B17, UOX         | 18    | 18              |
| Cell Death, Developmental Disorder, Cell Cycle                                                                      | ACOT7, ADORA1, AR, CDKN1A, CDKN1C, CREB1, DLG4, DMPK, EGR1, ESR1, FGFR3, FMR1, FOXM1, GPR125, IGF1R, IL6, IQSEC1, KDR, MCM4, MCM7, MDM2, MED1, MIDN, NIPSNAP1, NOTCH1, PIK3R1, PROX1, SFXN1, SIK1, SLC9A3R1, SPTBN2, SRC, TPM1, VEGFA, YY1                                 | 15    | 16              |
| Cellular Development, Cell-To-Cell Signaling and Interaction, Skeletal and Muscular System Development and Function | ADM, BMP2, CASP8, CCL13, CCR5, CRP, CXCL1, CXCL5, CYP2A6, F2, Gsk3, GSTM1, GSTM2, IFNGR1, IL13, INPP5D, KEAP1, Ldh, LIFR, LOC729505, LTB, MTOR, MVP, NDC80, NEDD9, PDLIM2, PLCG2, PSMB9, PSME2, SEPT11, SOX9, SQSTM1, TGFB1, TNF, ZWINT (includes EG:11130)                | 14    | 15              |
| Cell Death, Cell-mediated Immune Response, Cellular Development                                                     | ABCB4, ADM, AK4, CCL4, CCL13, CD69, CDK2, CDKN1A, CFLAR, CYP27A1, DAPK2 (includes EG:23604), DSG3, DSP, EIF4EBP1, FAM3B, GAB2, HSD17B7, IgG, IL2, JUP, LGALS1, MAPK14, MED1, PAEP, PECAM1, PHLDA2, Pkc(s), PPL, PRDM1, RND3, SPARC, STK17B, TCOF1, WWC2, ZFP36             | 14    | 15              |
| Inflammatory Response, Cellular Growth and Proliferation, Antimicrobial Response                                    | ACTN1, AHR, AICDA, ANXA2, ARG1, AUH, CASP1, CASP6, CCL3L3, CD24, CISH, CITED2, CRIP1, CTNNA1, CTSD, EPHX1, GPT2, IFNAR2, IL4, IL5, LPIN2, LTA, LTB, MAF, PDK1, PDLIM1, PMP22, PPARD, PRDM1, SATB1, SLC2A1, SOCS2, TUBA8, UBE2L6, UPB1                                      | 13    | 14              |
| Immunological Disease, Inflammatory Disease, Neurological Disease                                                   | AGTR1, ANPEP, CCL5, CCL9, CCL13, CCL3L3, CD97, CDK2, CSF3, CXCL13, DPP4, DUSP1, ELF1, ETS1, ETS2, GTF2B, IFNG, Igm, IL21, IL17A (includes EG:3605), IL2RA, LTA, LTB, MAPK14, MYO1C, PCK1, PIGR, RALGDS, Ras, RNA polymerase II, SLC27A2, SMARCB1, TLR9, TNNT3, TPMT        | 13    | 14              |
| Protein Synthesis, Cellular Function and Maintenance, Cell Death                                                    | ABCB1B, ACADM, ACE, AGRN, ARPC1B, BAX, CASP1, CAT, CDK2, COL1A1, DDX25, DPYD, DRD2, E2F1, EIF4E, EPHA2, GCG, GRIN2B, GSTM5, HRAS, HSPB1, HTT, IGFBP1, INS, LPIN1, NR1I2, PI3K (complex), SDHC, SLC1A1, SP1, SQSTM1, TAGLN2, TP53, YBX1, ZBTB10                             | 13    | 14              |
| Lipid Metabolism, Small Molecule Biochemistry, Carbohydrate Metabolism                                              | ACADVL, ALDOB, CDH1, CPS1, CREBBP, CYB5A, CYP2A12, CYP2C70, CYP3A4, EHHADH, EP300, FASN, FMO5, GCN1L1, GSTA3, GSTM6, GSTM3 (includes EG:14864), HADHA, HMGCR, IL6, IMPACT, INS, INS1, IQGAP1, LEP, Mediator, NFE2L2, SC4MOL, SC5DL, SCD, SREBF1, SREBF2, TLE3, VEGFA, ZW10 | 11    | 13              |
| Cellular Movement, Hematopoiesis, Immune Cell Trafficking                                                           | BIRC2, CCL13, CFLAR, CXCL1, CXCL5, EHD1, ELF3, EPHB2, ERK, HGF, IL6, KYNU, Ldh, LIFR, MAP3K5 (includes EG:4217), MAPK3, Mek, MIF, MMD, NRG1, PI3K (complex), PIGR, PLAU, PTPN12, SAA1, SDC2, SKIL, SLC10A1, SLC10A2, TAB3, TIAM1, TNF, TRAF2, Vegf, VEGFC                  | 10    | 12              |
| Lipid Metabolism, Molecular Transport, Small Molecule Biochemistry                                                  | ADIPOQ, AKT1, APOB, CCND1, CD36, CDKN1C, CEBPA, CTNNB1, DGAT1, EP300, FASN, FN1, FOXC2, G6PC, HNF4A, ID3, IL6, INS, LDL, LOC100129193, LPL, MEN1, MTTP, NFKB1, NOS2, NR1I2, ONECUT1, PPARG, RPA2, SCARB1, SCD, SGMS1, SLC2A4, STIM1, UCP2                                  | 7     | 10              |
