# Supplementary material for: Transgenic Overexpression of Tcfap2c/AP-2gamma Results in Liver Failure and Intestinal Dysplasia
Source: PubMed Central journal article supplement (PMC3135619; doi:10.1371/journal.pone.0022034), 2011-07-13
Supplement: pone.0022034.s005.pdf [file pone.0022034.s005.pdf]

Table S5  
Primer sequences

| Gene    | Primer Sequence (5' → 3')                            |
|---------|------------------------------------------------------|
| H19     | F: GTCTCGAAGAGCTCGGACTG<br>R: TGA CTGCCCTTCTGTCCTCT  |
| Sult1e1 | F: CAAAGATGTCGCCGTTTCTT<br>R: TTTTCCCACCAAGCTTTCAC   |
| Crip1   | F: TGCGACAAGGAGGTGTATTTTC<br>R: GGAGTAGCAGGGATGATTGC |
| ADM     | F: AGCATCCAGCAGCTACCCTA<br>R: ATGCCGTCCTTGTCTTTGTC   |
| Mogat1  | F: CTGGTTCTGTTTCCCGTTGT<br>R: TGGGTCAAGGCCATCTTAAC   |
| Alpl    | F: GCTGATCATTCCCACGTTTT<br>R: CTGGGCCTGGTAGTTGTTGT   |
| b-Actin | F: CCATCCTGCGTCTGGACCTG<br>R: GTAACAGTCCGCCTAGAAGC   |
| Fgfr3   | F: GAGACTTGGCTGCCAGAAAC<br>R: GGAGGACACCAAAGACCAA    |
| PPARD   | F: CTGGAGCTCGATGACAGTGA<br>R: CCGTCTTCTTTAGCCACTGC   |
| PPARA   | F: ATGCCAGTACTGCCGTTTTTC<br>R: GGCCTTGACCTTGTTTCATGT |
| Adh1    | F: ACAAACCCTTCACCATCGAG<br>R: TCGCTTCGGCTACAAAAGTT   |
| Arg1    | F: GTGAAGAACCCACGGTCTGT<br>R: CTGGTTGTCAGGGGAGTGTT   |
| Lipc    | F: CGGGAAGAACAAGATTGGAA<br>R: TTAAGCCATGCTCTGCAATG   |
| IGF1    | F: TGGATGCTCTTCAGTTCGTG<br>R: GTCTTGGGCATGTCAGTGTG   |
| Fgfr4   | F: AGCACCTACTGGACACACC<br>R: TCCGAGGGTACCACACTTTC    |
| Lipin-1 | F: CCATTCACAGCGAGTCTTCA<br>R: TGGAAGGGGAATCTGTCTTG   |

|         |                                                     |
|---------|-----------------------------------------------------|
| Hgfac   | F: CTGGGCGGTTCTGTAACATT<br>R: GGCAATACTCCCACGACAGT  |
| Cyp3a11 | F: CAGCTTGGTGCTCCTCTACC<br>R: CTCTGGGTCTGTGACAGCAA  |
| Hao1    | F: CTTCGCTGGATGCAACTGTA<br>R: TGCCAAATCATTGGTTTCAA  |
| cyp3a25 | F: CCGTTACTTGGCACCATTTT<br>F: GTTTGCCACTGGTGAAGGTT  |
| BMP4    | F: GACTTCGAGGCGACACTTCT<br>R: TATACGGTGGGAAGCCCTGTT |
| Pah     | F: AGCTTTGCCCAGTTTTCTCA<br>R: TACTCCTGGCAGGCTGTCTT  |
| Uox     | F: AGAACACTGTGCACGTCCTG<br>R: CTCATCTGCTCCACCTCACA  |
| Lipin2  | F: ACCCAAACCTAGAGCCCTGT<br>R: AATAGAGAGCCGCCACTTCA  |
